# Supplementary material for: Ecological and evolutionary drivers of haemoplasma infection and bacterial genotype sharing in a Neotropical bat community
Source: PubMed Central journal article supplement (PMC8299350; doi:10.1111/mec.15422), 2020-04-21
Supplement: MEC-29-1534-s001.pdf [file MEC-29-1534-s001.pdf]

**Supporting Information: Ecological and evolutionary drivers of hemoplasma infection and bacterial genotype sharing in a Neotropical bat community**

Daniel J. Becker, Kelly A. Speer, Alexis M. Brown, M. Brock Fenton, Alex D. Washburne,  
Sonia Altizer, Daniel G. Streicker, Raina K. Plowright, Vladimir E. Chizhikov, Nancy B.  
Simmons, Dmitriy V. Volokhov

**S1. Bat sampling**

**S2. Comparative data**

**S3. Infection status and prevalence**

**S4. Hemoplasma genotypes**

**S5. Ectoparasitism**

## S1. Bat sampling

Table S1. Sample size per bat species included in analyses of hemoplasma infection, stratified by year and site (LAR and KK).

| Species                          | 2017 |    | 2018 |    |
|----------------------------------|------|----|------|----|
|                                  | LAR  | KK | LAR  | KK |
| <i>Artibeus intermedius</i>      | 3    | 0  | 2    | 1  |
| <i>Artibeus jamaicensis</i>      | 4    | 1  | 6    | 0  |
| <i>Artibeus lituratus</i>        | 3    | 0  | 4    | 1  |
| <i>Bauerus dubiaquercus</i>      | 4    | 0  | 2    | 0  |
| <i>Carollia perspicillata</i>    | 3    | 2  | 2    | 1  |
| <i>Carollia sowelli</i>          | 11   | 0  | 8    | 1  |
| <i>Chrotopterus auritus</i>      | 0    | 3  | 1    | 0  |
| <i>Dermanura phaeotis</i>        | 8    | 0  | 7    | 3  |
| <i>Dermanura watsoni</i>         | 6    | 1  | 5    | 2  |
| <i>Desmodus rotundus</i>         | 22   | 21 | 66   | 27 |
| <i>Eptesicus furinalis</i>       | 8    | 1  | 10   | 0  |
| <i>Eumops nanus</i>              | 1    | 0  | 0    | 0  |
| <i>Gardnerycteris keenani</i>    | 0    | 0  | 2    | 0  |
| <i>Glossophaga soricina</i>      | 11   | 0  | 7    | 0  |
| <i>Lasiurus ega</i>              | 0    | 0  | 3    | 0  |
| <i>Lophostoma evotis</i>         | 1    | 0  | 2    | 0  |
| <i>Micronycteris schmidtorum</i> | 1    | 0  | 0    | 0  |
| <i>Mimon cozumelae</i>           | 1    | 0  | 0    | 5  |
| <i>Molossus nigricans</i>        | 14   | 0  | 7    | 0  |
| <i>Mormoops megalophylla</i>     | 0    | 0  | 1    | 1  |
| <i>Myotis elegans</i>            | 0    | 0  | 2    | 0  |
| <i>Myotis pilosatibialis</i>     | 1    | 0  | 3    | 0  |
| <i>Natalus mexicanus</i>         | 0    | 0  | 1    | 0  |
| <i>Noctilio leporinus</i>        | 0    | 0  | 1    | 0  |
| <i>Platyrrhinus helleri</i>      | 0    | 0  | 1    | 1  |
| <i>Pteronotus fulvus</i>         | 4    | 1  | 2    | 0  |
| <i>Pteronotus mesoamericanus</i> | 11   | 12 | 13   | 6  |
| <i>Rhogeessa aeneus</i>          | 0    | 0  | 1    | 0  |
| <i>Rhynchonycteris naso</i>      | 5    | 0  | 11   | 0  |
| <i>Saccopteryx bilineata</i>     | 9    | 0  | 9    | 0  |
| <i>Sturnira parvidens</i>        | 21   | 2  | 20   | 4  |
| <i>Trachops cirrhosus</i>        | 0    | 3  | 4    | 1  |
| <i>Uroderma convexum</i>         | 2    | 0  | 8    | 0  |

## S2. Comparative data

Figure S1. Pairwise phylogenetic distance between the 33 bat species included in our dataset.

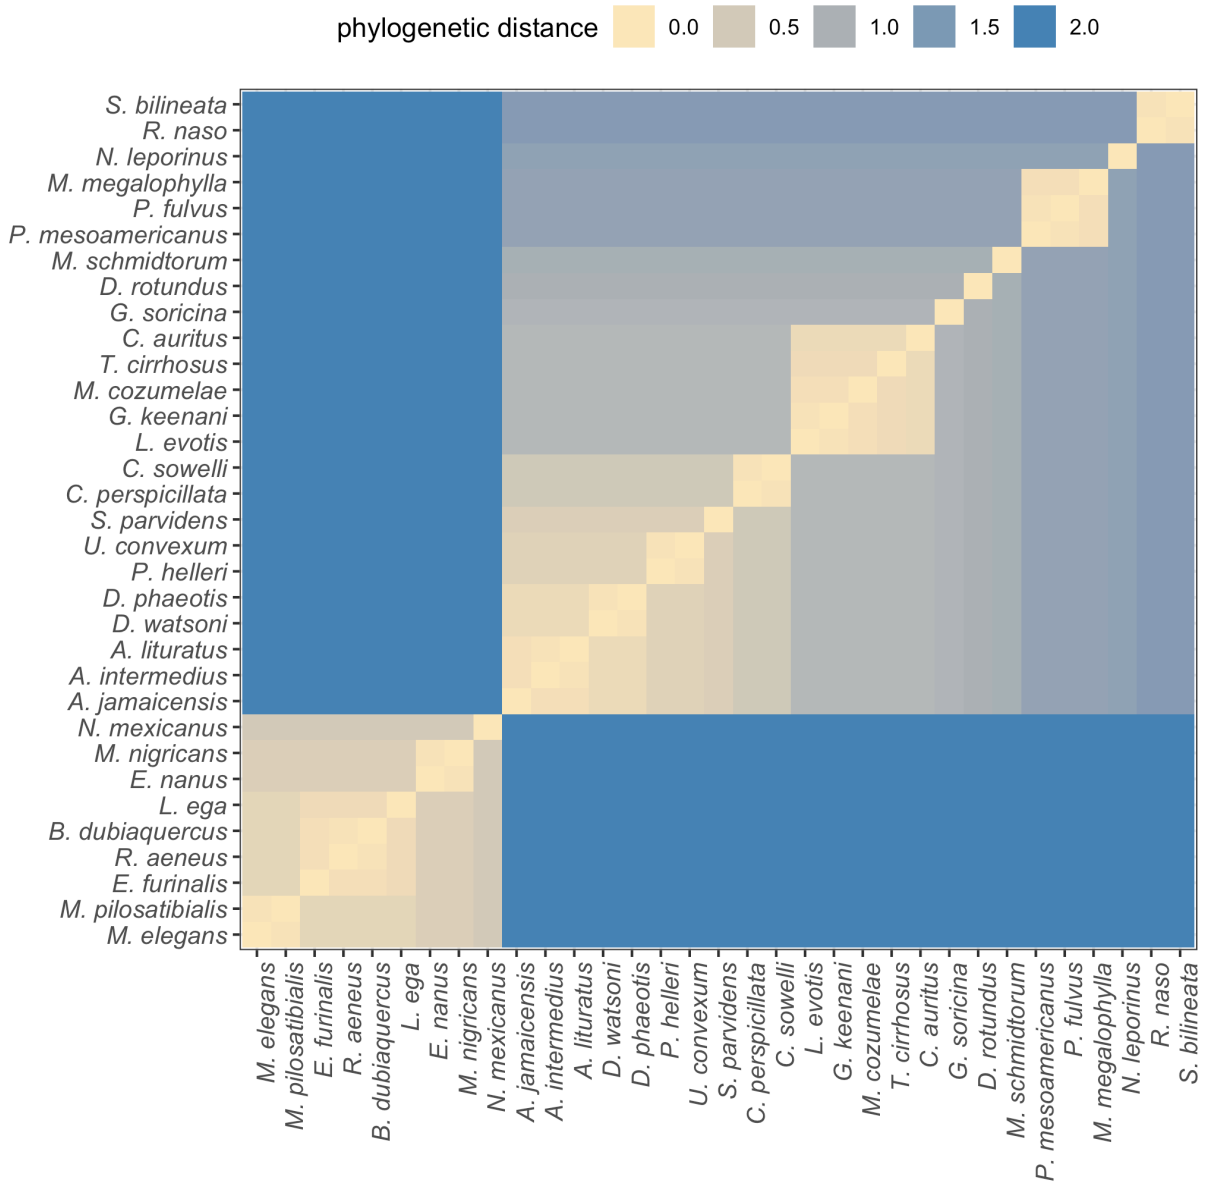

Figure S2. Map of geographic ranges for the 33 bat species sampled in Belize, stratified by whether hemoplasmas were detected. Transparent shapefiles from the International Union for Conservation of Nature are overlaid to highlight regions with dense distributional overlap.

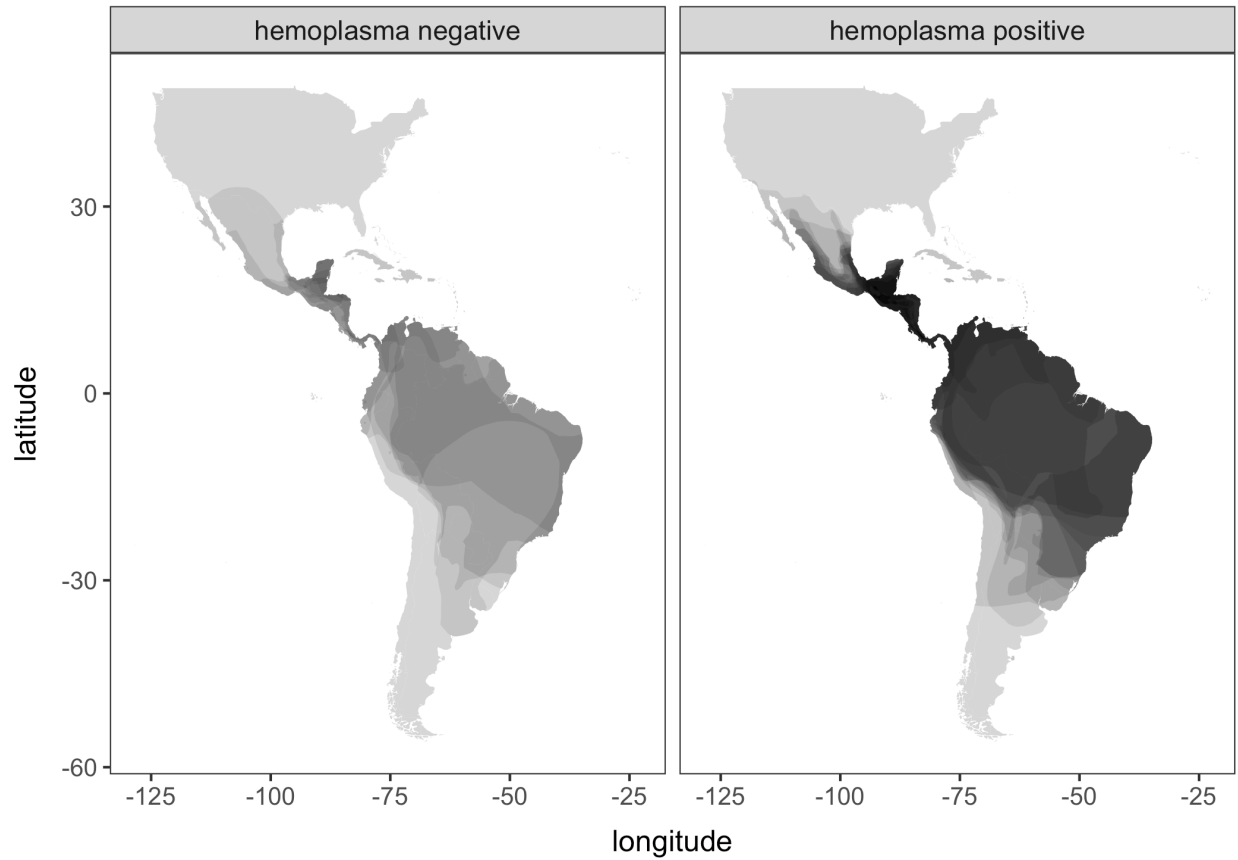

1 Table S2. Ecological and evolutionary trait data for the 33 Neotropical bat species included in phylogenetic comparative analyses.

| Species     | <i>N</i>                         | Mass | AF    | Guild | % plant   | Strata | AR             | Roost | RF     | Colony | KM <sup>2</sup> | ED       |      |
|-------------|----------------------------------|------|-------|-------|-----------|--------|----------------|-------|--------|--------|-----------------|----------|------|
| <i>Ai</i>   | <i>Artibeus intermedius</i>      | 6    | 60.5  | 1+    | plant     | 90     | arboreal       | 6.1   | closed | 1+     | small           | 14235952 | 0.08 |
| <i>Aj</i>   | <i>Artibeus jamaicensis</i>      | 11   | 42.2  | 1+    | plant     | 90     | arboreal       | 6.4   | closed | 1+     | small           | 1559896  | 0.12 |
| <i>Al</i>   | <i>Artibeus lituratus</i>        | 8    | 60.5  | 1+    | plant     | 90     | arboreal       | 6.1   | closed | 1+     | small           | 14235952 | 0.08 |
| <i>Bd</i>   | <i>Bauerus dubiaquercus</i>      | 6    | 22.2  | 1+    | insect    | 0      | aerial         | 6.1   | closed | 1      | small           | 265235   | 0.08 |
| <i>Cp</i>   | <i>Carollia perspicillata</i>    | 8    | 18    | 1+    | plant     | 100    | arboreal       | 6.1   | closed | 1+     | large           | 13796364 | 0.20 |
| <i>Cs</i>   | <i>Carollia sowelli</i>          | 20   | 16.5  | 1+    | plant     | 100    | arboreal       | 5.5   | closed | 1+     | large           | 790178   | 0.20 |
| <i>Ca</i>   | <i>Chrotopterus auritus</i>      | 4    | 77.7  | 1     | carnivore | 30     | arboreal       | 5.5   | closed | 1+     | small           | 13116793 | 0.30 |
| <i>Dp</i>   | <i>Dermanura phaeotis</i>        | 18   | 11.6  | 1+    | plant     | 90     | arboreal       | 6.3   | open   | 1      | small           | 3737367  | 0.11 |
| <i>Dw</i>   | <i>Dermanura watsoni</i>         | 14   | 11.2  | 1+    | plant     | 90     | arboreal       | 5.9   | open   | 1      | small           | 554677   | 0.11 |
| <i>Dr</i>   | <i>Desmodus rotundus</i>         | 139  | 31.2  | 1+    | carnivore | 0      | ground/aquatic | 6.7   | closed | 1+     | large           | 17726518 | 0.56 |
| <i>Ef</i>   | <i>Eptesicus furinalis</i>       | 19   | 7.74  | 1+    | insect    | 0      | aerial         | 6.2   | closed | 1+     | large           | 16292708 | 0.13 |
| <i>En</i>   | <i>Eumops nanus</i>              | 1    | 11.9  | 1     | insect    | 0      | aerial         | 8.8   | closed | 1      | small           | 48804    | 0.23 |
| <i>Gk</i>   | <i>Gardnerycteris keenani</i>    | 2    | 13.8  | 1     | insect    | 50     | arboreal       | 8.3   | NA     | 1      | small           | 11136331 | 0.08 |
| <i>Gs</i>   | <i>Glossophaga soricina</i>      | 18   | 9.4   | 1+    | plant     | 60     | arboreal       | 6.4   | closed | 1+     | medium          | 14858410 | 0.51 |
| <i>Lega</i> | <i>Lasiurus ega</i>              | 3    | 13.2  | 1+    | insect    | 0      | aerial         | 7.9   | closed | 1+     | small           | 13205183 | 0.19 |
| <i>Le</i>   | <i>Lophostoma evotis</i>         | 3    | 20.6  | 1     | insect    | 10     | arboreal       | 5.3   | closed | 1+     | small           | 176593   | 0.08 |
| <i>Ms</i>   | <i>Micronycteris schmidtorum</i> | 1    | 7.5   | 1     | insect    | 20     | arboreal       | 5.7   | closed | 1      | small           | 6504802  | 0.61 |
| <i>Mc</i>   | <i>Mimon cozumelae</i>           | 6    | 18.6  | 1     | insect    | 30     | arboreal       | 8.3   | closed | 1+     | small           | 803519   | 0.13 |
| <i>Mn</i>   | <i>Molossus nigricans</i>        | 21   | 25    | 1+    | insect    | 0      | aerial         | 11.1  | closed | 1      | large           | 14800275 | 0.23 |
| <i>Mm</i>   | <i>Mormoops megalophylla</i>     | 2    | 15.8  | 1     | insect    | 0      | aerial         | 7.1   | closed | 1      | large           | 3738686  | 0.38 |
| <i>Me</i>   | <i>Myotis elegans</i>            | 2    | 4.1   | 1     | insect    | 0      | aerial         | 6.4   | closed | 1      | large           | 587280   | 0.16 |
| <i>Mp</i>   | <i>Myotis pilosatibialis</i>     | 4    | 5.3   | 1     | insect    | 0      | aerial         | 6.4   | closed | 1      | large           | 2736294  | 0.16 |
| <i>Nm</i>   | <i>Natalus mexicanus</i>         | 1    | 5.5   | 1     | insect    | 0      | aerial         | 5.8   | closed | 1      | large           | 2433276  | 0.63 |
| <i>Nl</i>   | <i>Noctilio leporinus</i>        | 1    | 58.3  | 1     | carnivore | 0      | ground/aquatic | 9     | closed | 1+     | large           | 14625648 | 0.76 |
| <i>Ph</i>   | <i>Platyrrhinus helleri</i>      | 2    | 13.5  | 1+    | plant     | 90     | arboreal       | 6.4   | closed | 1+     | small           | 10016822 | 0.14 |
| <i>Pf</i>   | <i>Pteronotus fulvus</i>         | 7    | 9.21  | 1     | insect    | 0      | aerial         | 8.3   | NA     | 1      | large           | 3471860  | 0.20 |
| <i>Pm</i>   | <i>Pteronotus mesoamericanus</i> | 42   | 19.7  | 1     | insect    | 0      | aerial         | 6.7   | closed | 1+     | large           | 539713   | 0.20 |
| <i>Ra</i>   | <i>Rhogeessa aeneus</i>          | 1    | 4.2   | 1+    | insect    | 0      | aerial         | 6.1   | closed | 1      | large           | 144232   | 0.08 |
| <i>Rn</i>   | <i>Rhynchonycteris naso</i>      | 16   | 3.8   | 1+    | insect    | 0      | aerial         | 6.5   | open   | 1      | medium          | 11508828 | 0.45 |
| <i>Sb</i>   | <i>Saccopteryx bilineata</i>     | 18   | 7.8   | 1     | insect    | 0      | aerial         | 6.1   | open   | 1      | medium          | 12632095 | 0.45 |
| <i>Sp</i>   | <i>Sturnira parvidens</i>        | 47   | 19.1  | 1+    | plant     | 100    | arboreal       | 6.5   | open   | 1      | small           | 4859514  | 0.30 |
| <i>Tc</i>   | <i>Trachops cirrhosus</i>        | 8    | 37.67 | 1     | carnivore | 10     | ground/aquatic | 6.3   | closed | 1+     | small           | 12642872 | 0.20 |
| <i>Uc</i>   | <i>Uroderma convexum</i>         | 10   | 16.69 | 1+    | plant     | 90     | arboreal       | 6.3   | NA     | 1      | medium          | 12796601 | 0.14 |

2 \**N*: Number of individuals per bat species screened for hemoplasma infection; AF: annual fecundity; AR: aspect ratio; RF: roost  
3 flexibility; ED: evolutionary distinctiveness. Data for *Pf*, *Sp*, *Mn*, *Mp*, and *Uc* were taken from the bat species from which they were  
4 originally classified (*Pteronotus davyi*, *Sturnira lilium*, *Molossus rufus*, *Myotis keaysi*, and *Uroderma bilobatum*).

5 **S3. Infection status and prevalence**

6 Table S3. Hemoplasma infection prevalence (i.e., the proportion of sequence-confirmed,  
7 hemoplasma-positive bats) for each species, stratified by site and year in northern Belize.

| Species                       | Site | Year | <i>N</i> | +  | %    |
|-------------------------------|------|------|----------|----|------|
| <i>Artibeus intermedius</i>   | KK   | 2018 | 1        | 1  | 1    |
| <i>Artibeus intermedius</i>   | LAR  | 2017 | 3        | 2  | 0.67 |
| <i>Artibeus intermedius</i>   | LAR  | 2018 | 2        | 1  | 0.5  |
| <i>Artibeus jamaicensis</i>   | KK   | 2017 | 1        | 1  | 1    |
| <i>Artibeus jamaicensis</i>   | LAR  | 2017 | 4        | 4  | 1    |
| <i>Artibeus jamaicensis</i>   | LAR  | 2018 | 6        | 4  | 0.67 |
| <i>Artibeus lituratus</i>     | KK   | 2018 | 1        | 0  | 0    |
| <i>Artibeus lituratus</i>     | LAR  | 2017 | 3        | 2  | 0.67 |
| <i>Artibeus lituratus</i>     | LAR  | 2018 | 4        | 3  | 0.75 |
| <i>Bauerus dubiaquercus</i>   | LAR  | 2017 | 4        | 0  | 0    |
| <i>Bauerus dubiaquercus</i>   | LAR  | 2018 | 2        | 0  | 0    |
| <i>Carollia perspicillata</i> | KK   | 2017 | 2        | 1  | 0.5  |
| <i>Carollia perspicillata</i> | KK   | 2018 | 1        | 0  | 0    |
| <i>Carollia perspicillata</i> | LAR  | 2017 | 3        | 1  | 0.33 |
| <i>Carollia perspicillata</i> | LAR  | 2018 | 2        | 1  | 0.5  |
| <i>Carollia sowelli</i>       | KK   | 2018 | 1        | 1  | 1    |
| <i>Carollia sowelli</i>       | LAR  | 2017 | 11       | 2  | 0.18 |
| <i>Carollia sowelli</i>       | LAR  | 2018 | 8        | 4  | 0.5  |
| <i>Chrotopterus auritus</i>   | KK   | 2017 | 3        | 0  | 0    |
| <i>Chrotopterus auritus</i>   | LAR  | 2018 | 1        | 0  | 0    |
| <i>Dermanura phaeotis</i>     | KK   | 2018 | 3        | 0  | 0    |
| <i>Dermanura phaeotis</i>     | LAR  | 2017 | 9        | 4  | 0.44 |
| <i>Dermanura phaeotis</i>     | LAR  | 2018 | 7        | 4  | 0.57 |
| <i>Dermanura watsoni</i>      | KK   | 2017 | 1        | 1  | 1    |
| <i>Dermanura watsoni</i>      | KK   | 2018 | 2        | 1  | 0.5  |
| <i>Dermanura watsoni</i>      | LAR  | 2017 | 6        | 3  | 0.5  |
| <i>Dermanura watsoni</i>      | LAR  | 2018 | 5        | 0  | 0    |
| <i>Desmodus rotundus</i>      | KK   | 2017 | 21       | 20 | 0.95 |
| <i>Desmodus rotundus</i>      | KK   | 2018 | 29       | 14 | 0.48 |
| <i>Desmodus rotundus</i>      | LAR  | 2017 | 22       | 13 | 0.59 |
| <i>Desmodus rotundus</i>      | LAR  | 2018 | 68       | 38 | 0.56 |
| <i>Eptesicus furinalis</i>    | KK   | 2017 | 1        | 1  | 1    |
| <i>Eptesicus furinalis</i>    | LAR  | 2017 | 8        | 6  | 0.75 |
| <i>Eptesicus furinalis</i>    | LAR  | 2018 | 10       | 8  | 0.8  |
| <i>Eumops nanus</i>           | LAR  | 2017 | 1        | 0  | 0    |
| <i>Gardnerycteris keenani</i> | LAR  | 2018 | 2        | 0  | 0    |
| <i>Glossophaga soricina</i>   | LAR  | 2017 | 11       | 2  | 0.18 |
| <i>Glossophaga soricina</i>   | LAR  | 2018 | 7        | 2  | 0.29 |

|                                  |     |      |    |    |      |
|----------------------------------|-----|------|----|----|------|
| <i>Lasiurus ega</i>              | LAR | 2018 | 3  | 0  | 0    |
| <i>Lophostoma evotis</i>         | LAR | 2017 | 1  | 1  | 1    |
| <i>Lophostoma evotis</i>         | LAR | 2018 | 2  | 2  | 1    |
| <i>Micronycteris schmidtorum</i> | LAR | 2017 | 1  | 0  | 0    |
| <i>Mimon cozumelae</i>           | KK  | 2018 | 5  | 0  | 0    |
| <i>Mimon cozumelae</i>           | LAR | 2017 | 1  | 0  | 0    |
| <i>Molossus nigricans</i>        | LAR | 2017 | 14 | 13 | 0.93 |
| <i>Molossus nigricans</i>        | LAR | 2018 | 7  | 3  | 0.43 |
| <i>Mormoops megalophylla</i>     | KK  | 2018 | 1  | 0  | 0    |
| <i>Mormoops megalophylla</i>     | LAR | 2018 | 1  | 0  | 0    |
| <i>Myotis elegans</i>            | LAR | 2018 | 2  | 2  | 1    |
| <i>Myotis pilosatibialis</i>     | LAR | 2017 | 1  | 1  | 1    |
| <i>Myotis pilosatibialis</i>     | LAR | 2018 | 3  | 2  | 0.67 |
| <i>Natalus mexicanus</i>         | LAR | 2018 | 1  | 1  | 1    |
| <i>Noctilio leporhinus</i>       | LAR | 2018 | 1  | 0  | 0    |
| <i>Platyrrhinus helleri</i>      | KK  | 2018 | 1  | 0  | 0    |
| <i>Platyrrhinus helleri</i>      | LAR | 2018 | 1  | 1  | 1    |
| <i>Pteronotus fulvus</i>         | KK  | 2017 | 1  | 0  | 0    |
| <i>Pteronotus fulvus</i>         | LAR | 2017 | 4  | 1  | 0.25 |
| <i>Pteronotus fulvus</i>         | LAR | 2018 | 2  | 1  | 0.5  |
| <i>Pteronotus mesoamericanus</i> | KK  | 2017 | 12 | 7  | 0.58 |
| <i>Pteronotus mesoamericanus</i> | KK  | 2018 | 6  | 5  | 0.83 |
| <i>Pteronotus mesoamericanus</i> | LAR | 2017 | 11 | 8  | 0.73 |
| <i>Pteronotus mesoamericanus</i> | LAR | 2018 | 13 | 9  | 0.69 |
| <i>Rhogeesa aeneus</i>           | LAR | 2018 | 1  | 0  | 0    |
| <i>Rhynchonycteris naso</i>      | LAR | 2017 | 5  | 1  | 0.2  |
| <i>Rhynchonycteris naso</i>      | LAR | 2018 | 11 | 1  | 0.09 |
| <i>Saccopteryx bilineata</i>     | LAR | 2017 | 9  | 1  | 0.11 |
| <i>Saccopteryx bilineata</i>     | LAR | 2018 | 9  | 1  | 0.11 |
| <i>Sturnira parvidens</i>        | KK  | 2017 | 2  | 1  | 0.5  |
| <i>Sturnira parvidens</i>        | KK  | 2018 | 4  | 2  | 0.5  |
| <i>Sturnira parvidens</i>        | LAR | 2017 | 23 | 11 | 0.48 |
| <i>Sturnira parvidens</i>        | LAR | 2018 | 20 | 13 | 0.65 |
| <i>Trachops cirrhosus</i>        | KK  | 2017 | 3  | 2  | 0.67 |
| <i>Trachops cirrhosus</i>        | KK  | 2018 | 1  | 1  | 1    |
| <i>Trachops cirrhosus</i>        | LAR | 2018 | 4  | 4  | 1    |
| <i>Uroderma convexum</i>         | LAR | 2017 | 2  | 1  | 0.5  |
| <i>Uroderma convexum</i>         | LAR | 2018 | 8  | 3  | 0.38 |

10 Table S4. Competing phylogenetic GLMMs predicting hemoplasma infection status across the Belize bat community ( $n=323$  after  
 11 removing missing values). Models are ranked by  $\Delta$ LOOIC with their LOOIC SE, Akaike weights ( $w_i$ ) and Bayesian  $R^2$  estimates.

| <b>Model structure</b>                                                          | <b>LOOIC</b> | <b>SE</b> | <b><math>\Delta</math>LOOIC</b> | <b><math>w_i</math></b> | <b><math>R^2_m</math></b> | <b><math>R^2_c</math></b> |
|---------------------------------------------------------------------------------|--------------|-----------|---------------------------------|-------------------------|---------------------------|---------------------------|
| ~ sex + ectoparasite + reproduction + site * year + (1 species) + (1 phylogeny) | 404.56       | 16.1      | 0.00                            | 0.29                    | 0.07                      | 0.23                      |
| ~ sex + ectoparasite + reproduction + year + (1 species) + (1 phylogeny)        | 404.72       | 15.2      | 0.16                            | 0.27                    | 0.05                      | 0.22                      |
| ~ sex + ectoparasite + reproduction + site + year + (1 species) + (1 phylogeny) | 405.77       | 15.3      | 1.21                            | 0.16                    | 0.05                      | 0.22                      |
| ~ sex * reproduction + ectoparasite + year + (1 species) + (1 phylogeny)        | 406.57       | 15.3      | 2.00                            | 0.11                    | 0.05                      | 0.22                      |
| ~ sex * reproduction + ectoparasite + site * year + (1 species) + (1 phylogeny) | 406.72       | 16.2      | 2.16                            | 0.10                    | 0.07                      | 0.24                      |
| ~ sex * reproduction + ectoparasite + year + (1 species) + (1 phylogeny)        | 407.48       | 15.6      | 2.92                            | 0.07                    | 0.06                      | 0.22                      |

12  
 13



#### 14 **S4. Hemoplasma genotypes**

15 We here provide details of how each identified genotype (Table 2) is phylogenetically related to  
16 one another and other sequences identified in GenBank (updated March 2020, see Fig. S3).

17 The MR1 genotype, identified from *Molossus nigricans* (formerly classified as *M. rufus*  
18 [1]), showed 92.5% and 94.3% similarity to *Candidatus Mycoplasma turicensis* and *Mycoplasma*  
19 *coccoides*, as well as 98.3% similarity to hemoplasmas previously detected in *M. molossus* in  
20 Brazil (KY356748) [2]. The PPM genotype, which had 98.6% similarity to VBG1 [3], was  
21 identified from *Pteronotus mesoamericanus* and in one sample from *P. fulvus* (formerly  
22 classified as *P. davyi* [4,5]; MK353825). The 16S rRNA sequence from another *P. fulvus*  
23 (MH245133) was identical to VBG1. The NM genotype, identified in one *Natalus mexicanus*,  
24 showed 99.3% and 98.3% similarity to PPM and VBG1, respectively; however, the species-  
25 specific pattern of mutations allowed us to discriminate NM from these two genotypes. The  
26 RHN genotype, identified in a single *Rhynchonycteris naso*, demonstrated a unique sequence  
27 with 93.3-94.4% similarity to *Candidatus Mycoplasma haemohominis* [6], *Candidatus*  
28 *Mycoplasma turicensis*, and *M. haemomuris*; 94.8% similarity to *Candidatus Mycoplasma*  
29 *haemomacaque*; and 95.6-96.1% similarity to the PPM and SP genotypes (see below).

30 Two distinct hemoplasma genotypes (CS1 and CS2) were identified in *Carollia* spp. CS1,  
31 only identified in *C. sowelli*, was 98.0% similar to VBG3, while CS2 (identified in both *C.*  
32 *sowelli* and *C. perspicillata*) was 97.7% and 97.4% similar to VBG3 and CS1, respectively. The  
33 unique GLS genotype identified in a single *Glossophaga soricina* demonstrated 98.1% similarity  
34 to VBG3 and 96.8% and 97.4% similarity to the CS1 and CS2 genotypes, respectively.

35 The EF1 genotype comprised hemoplasma sequences that were mainly identified in  
36 *Eptesicus furinalis* alongside single positive samples from *Saccopteryx bilineata* (MK353889)

37 and *Glossophaga soricina* (MH245128); this genotype was 96.9% similar to *Candidatus M.*  
38 *haemohominis* as well as 96.7-98.2% similar to hemoplasma genotypes previously detected in  
39 *Miniopterus schreibersii* and *Myotis capaccinii* from Spain [7] and to a hemoplasma genotype  
40 previously detected in bat ticks (*Ixodes simplex*) from Hungary [8]. The MYK genotype,  
41 identified in one *Myotis pilosatibialis* (previously classified as *M. keaysi* [9]), was 97.3% similar  
42 to the EF1 genotype, 96.2% similar to *Candidatus M. haemohominis*, and 96.5-98.0% similar to  
43 the above-mentioned genotypes previously detected in bats from Spain [7] and bat ticks from  
44 Hungary [8]. Both the EF2 genotype (identified in *E. furinalis*) and the MR2 genotype (identified  
45 in *Molossus nigricans*) were 98.9% similar to one another; however, species-specific mutation  
46 patterns again facilitated discriminating these genotypes. Both genotypes were 97.7% similar to  
47 the MYE genotype from *Myotis elegans* and *M. pilosatibialis*, and all three of these genotypes  
48 (MYE, EF2, and MR2) showed 97.6-98.3% similarity to the hemoplasma genotype previously  
49 identified in little brown bats (*M. lucifugus*) from the eastern and northeastern United States [10]  
50 and to hemoplasmas detected in *M. chiloensis* from Chile (MK295627, MK295629, and  
51 MK295630) [11]. The EF2 and MR2 genotypes were also 93.5-94.5% similar to *Candidatus M.*  
52 *haemomacaque*, *M. haemomuris*, *Candidatus M. turicensis*, and *Candidatus M. haemohominis*.

53 The APH1 genotype was identified in *Dermanura phaeotis*, *D. watsoni*, and in one *A.*  
54 *lituratus*; this genotype showed 99.0% similarity to the PLU genotype detected in one  
55 *Platyrrhinus helleri* and in one *Uroderma convexum* (formerly classified as *U. bilobatum*  
56 [12,13]). These genotypes were further discriminated based on species-specific pattern of their  
57 mutations. The APH1 and PLU genotypes were 96.3-96.6% similar to the APH2 genotype from  
58 *Artibeus jamaicensis*, *A. lituratus*, and *A. intermedius*. The APH2 genotype showed 98.3%

59 similarity to VBG2 [3] and the UB genotype. The APH3 genotype was found in *A. intermedius*  
60 and was 96.2-96.7% similar to the CS1 and CS2 genotypes.

61 Two genotypes (TC1 and TC2) identified in *Trachops cirrhosus* were 96.7% similar to  
62 each other, and both were 96.6% similar to the LE genotype identified in *Lophostoma evotis*. The  
63 TC1, TC2, and LE genotypes were 97.3%, 96.3%, and 96.6% similar to the PPM and NM  
64 genotypes. The SP genotype, which comprised slightly divergent (99.4% intra-genotype  
65 sequence similarity) but closely related hemoplasma species, was identified in *Sturnira*  
66 *parvidens* (previously classified as *S. lilium* [14,15]) and in one *A. lituratus*. The SP genotype  
67 was most closely related to the UB genotype (99.1% similar) and was 98.4% similar to the APH2  
68 genotype and VBG2. However, due to some diversity of SP sequences and their similarity to UB,  
69 APH2, and VBG2, the SP genotype did not form a distinct branch with significant bootstrap  
70 support on the phylogeny (Fig. S3). Thus, sequences within the SP genotype may comprise at  
71 least three closely related hemoplasma species or geographic clones (or isolates) of the same  
72 species (e.g., see the hypothetical groups A, B, and C on Fig. S3). However, definitive  
73 conclusions on the hemoplasma species repertoire within the SP genotype cannot be made given  
74 only analysis of the partial 16S rRNA gene; the nucleotide and phylogenetic analysis of  
75 additional housekeeping genes (e.g., *rpoB*, *gyrB*) [16,17] or the employment of next-generation  
76 sequencing methods [18–20] to screen for the full spectrum of blood-borne bacteria in bat  
77 samples will be required for future studies of these hemoplasma genotypes. All genotypes  
78 demonstrated minor levels of intra-genotype sequence variability (99.4–100%; see Table 2).

79 Lastly, three non-hemotropic *Mycoplasma* spp. genotypes were identified from five  
80 different bat species in Belize. Three *M. moatsii*-like sequences (numbered as 1–3) from  
81 *Pteronotus mesoamericanus*, *Myotis pilosatibialis*, and *Rhynchonycteris naso* showed 95.2%,

82 98.1%, and 96.9% similarity, respectively, to the 16S rRNA gene of *M. moatsii* type strain  
83 MK405 (NR\_025186), a non-hemotropic *Mycoplasma* sp. isolated from grivet monkeys  
84 (*Cercopithecus aethiops*) [21]. We previously reported the *M. moatsii*-like genotype in  
85 *Desmodus rotundus* (KY932724) from Belize sampled in 2014 and 2015 [3]. However, these  
86 three novel *M. moatsii*-like sequences were not identical to each other or to the *M. moatsii*-like  
87 genotype previously found in *D. rotundus* (numbered as 4); thus, the *M. moatsii*-like genotype 1  
88 showed 97.0%, 96.1%, and 96.9% similarity to the *M. moatsii*-like genotypes 2-4, the *M.*  
89 *moatsii*-like genotype 2 showed 97.0%, 97.9%, and 98.2% similarity to the *M. moatsii*-like  
90 genotypes 1, 3-4, the *M. moatsii*-like genotype 3 showed 96.1%, 97.9%, and 96.3% similarity to  
91 the *M. moatsii*-like genotypes 1, 2, 4. This suggests these sequences are derived from closely  
92 related but different non-hemotropic *Mycoplasma* spp. in bats. The *M. lagogenitalium*-like  
93 genotype from *G. soricina* showed 96.5% and 97.6% similarity to the 16S rRNA genes of *M.*  
94 *lagogenitalium* type strain 12MS (NR\_025185), a non-hemotropic *Mycoplasma* sp. described in  
95 Afghan pikas (*Ochotona rufescens*) [22] and *Mycoplasma* sp. EDS-4 isolated from house musk  
96 shrew (*Suncus murinus*) [23]. The *M. muris*-like genotype identified from *Sacropteryx bilineata*  
97 demonstrated 98.1% similarity to the 16S rRNA genes of *M. muris* type strain RIII-4  
98 (NR\_044664), a non-hemotropic *Mycoplasma* sp. isolated from mice [24].

99 *References*

100

101

102 1. Loureiro LO, Engstrom MD, Lim BK. 2020 Single nucleotide polymorphisms (SNPs)  
103 provide unprecedented resolution of species boundaries, phylogenetic relationships, and  
104 genetic diversity in the mastiff bats (*Molossus*). *Mol. Phylogenet. Evol.* **143**, 106690.

105 2. Ikeda P *et al.* 2017 Evidence and molecular characterization of *Bartonella*  
106 spp. and hemoplasmas in neotropical bats in Brazil.  
107 *Epidemiol. Amp Infect.* , 1–15. (doi:10.1017/S0950268817000966)

108 3. Volokhov DV, Becker DJ, Bergner LM, Camus MS, Orton RJ, Chizhikov VE, Altizer SM,  
109 Streicker DG. 2017 Novel hemotropic mycoplasmas are widespread and genetically diverse  
110 in vampire bats. *Epidemiol. Infect.*

111 4. Pavan AC, Marroig G. 2016 Integrating multiple evidences in taxonomy: species diversity  
112 and phylogeny of mustached bats (*Mormoopidae*: *Pteronotus*). *Mol. Phylogenet. Evol.* **103**,  
113 184–198.

114 5. Pavan AC, Marroig G. 2017 Timing and patterns of diversification in the Neotropical bat  
115 genus *Pteronotus* (*Mormoopidae*). *Mol. Phylogenet. Evol.* **108**, 61–69.

116 6. Steer JA, Tasker S, Barker EN, Jensen J, Mitchell J, Stocki T, Chalker VJ, Hamon M. 2011  
117 A Novel Hemotropic Mycoplasma (*Hemoplasma*) in a Patient With Hemolytic Anemia and  
118 Pyrexia. *Clin. Infect. Dis. Off. Publ. Infect. Dis. Soc. Am.* **53**, e147–e151.  
119 (doi:10.1093/cid/cir666)

120 7. Millán J, López-Roig M, Delicado V, Serra-Cobo J, Esperón F. 2015 Widespread infection  
121 with hemotropic mycoplasmas in bats in Spain, including a hemoplasma closely related to  
122 “*Candidatus Mycoplasma hemohominis*”. *Comp. Immunol. Microbiol. Infect. Dis.* **39**, 9–12.  
123 (doi:10.1016/j.cimid.2015.01.002)

124 8. Hornok S *et al.* 2019 Molecular detection of vector-borne bacteria in bat ticks (*Acari*:  
125 *Ixodidae*, *Argasidae*) from eight countries of the Old and New Worlds. *Parasit. Vectors* **12**,  
126 50. (doi:10.1186/s13071-019-3303-4)

127 9. Mantilla-Meluk H, Munoz-Garay J. 2014 Biogeography and taxonomic status of *Myotis*  
128 *keaysi pilosatibialis* LaVal 1973 (*Chiroptera*: *Vespertilionidae*). *Zootaxa* **3793**, 60–70.

129 10. Mascarelli PE, Keel MK, Yabsley M, Last LA, Breitschwerdt EB, Maggi RG. 2014  
130 Hemotropic mycoplasmas in little brown bats (*Myotis lucifugus*). *Parasit Vectors* **7**, 117.

131 11. Millán J, Cevidanes A, Sacristán I, Alvarado M, Sepúlveda G, Ramos-Mella CA, Lisón F.  
132 2019 Detection and Characterization of Hemotropic Mycoplasmas in Bats in Chile. *J. Wildl.*  
133 *Dis.* (doi:10.7589/2018-12-290)

134 12. Mantilla-Meluk H. 2014 *Defining species and species boundaries in Uroderma (Chiroptera:*  
135 *Phyllostomidae) with a description of a new species*. Museum of Texas Tech University.

- 136 13. Cuadrado-Ríos S, Mantilla-Meluk H. 2016 Timing the evolutionary history of tent-making  
137 bats, genus *Uroderma* (Phyllostomidae): A biogeographic context. *Mamm. Biol.* **81**, 579–  
138 586. (doi:10.1016/j.mambio.2016.07.045)
- 139 14. Hernández-Canchola G, León-Paniagua L. 2017 Genetic and ecological processes promoting  
140 early diversification in the lowland Mesoamerican bat *Sturnira parvidens* (Chiroptera:  
141 Phyllostomidae). *Mol. Phylogenet. Evol.* **114**, 334–345.
- 142 15. Velazco PM, Patterson BD. 2013 Diversification of the yellow-shouldered bats, genus  
143 *Sturnira* (Chiroptera, Phyllostomidae), in the New World tropics. *Mol. Phylogenet. Evol.* **68**,  
144 683–698.
- 145 16. Volokhov DV, Simonyan V, Davidson MK, Chizhikov VE. 2012 RNA polymerase beta  
146 subunit (*rpoB*) gene and the 16S–23S rRNA intergenic transcribed spacer region (ITS) as  
147 complementary molecular markers in addition to the 16S rRNA gene for phylogenetic  
148 analysis and identification of the species of the family Mycoplasmataceae. *Mol. Phylogenet.*  
149 *Evol.* **62**, 515–528.
- 150 17. Volokhov DV, Hwang J, Chizhikov VE, Danaceau H, Gottdenker NL. 2017 Prevalence,  
151 Genotype Richness, and Coinfection Patterns of Hemotropic Mycoplasmas in Raccoons  
152 (*Procyon lotor*) on Environmentally Protected and Urbanized Barrier Islands. *Appl. Environ.*  
153 *Microbiol.* **83**. (doi:10.1128/AEM.00211-17)
- 154 18. Horiba K *et al.* 2018 Comprehensive detection of pathogens in immunocompromised  
155 children with bloodstream infections by next-generation sequencing. *Sci. Rep.* **8**, 3784.  
156 (doi:10.1038/s41598-018-22133-y)
- 157 19. Van Borm S *et al.* 2015 Next-generation sequencing in veterinary medicine: how can the  
158 massive amount of information arising from high-throughput technologies improve  
159 diagnosis, control, and management of infectious diseases? *Methods Mol. Biol. Clifton NJ*  
160 **1247**, 415–436. (doi:10.1007/978-1-4939-2004-4\_30)
- 161 20. Granberg F, Bálint Á, Belák S. 2016 Novel technologies applied to the nucleotide  
162 sequencing and comparative sequence analysis of the genomes of infectious agents in  
163 veterinary medicine. *Rev. Sci. Tech. Int. Off. Epizoot.* **35**, 25–42.  
164 (doi:10.20506/rst.35.1.2415)
- 165 21. Madden DL, Moats KE, London WT, Matthew EB, Sever JL. 1974 *Mycoplasma moatsii*, a  
166 new species isolated from recently imported Grivet monkeys (*Cercopithecus aethiops*). *Int. J.*  
167 *Syst. Evol. Microbiol.* **24**, 459–464.
- 168 22. Kobayashi H, Runge M, Schmidt R, Kubo M, Yamamoto K, Kirchhoff H. 1997 *Mycoplasma*  
169 *lagogenitalium* sp. nov., from the preputial smegma of Afghan pikas (*Ochotona rufescens*  
170 *rufescens*). *Int. J. Syst. Bacteriol.* **47**, 1208–1211. (doi:10.1099/00207713-47-4-1208)
- 171 23. Goto K, Yasuda M, Hayashimoto N, Ebukuro S. 2010 Morphological and sequence analysis  
172 of *Mycoplasma* sp. isolated from the oral cavity of a house musk shrew (*Suncus murinus*). *J.*  
173 *Vet. Med. Sci.* **72**, 109–111.

174 24. McGarrity GJ, Rose DL, Kwiatkowski V, Dion AS, Phillips DM, Tully JG. 1983  
175 Mycoplasma muris, a new species from laboratory mice. *Int. J. Syst. Evol. Microbiol.* **33**,  
176 350–355.

177

178 Figure S3. Phylogenetic relationships based on sequence data for the partial 16S rRNA gene  
179 (approx. 864-878 bp) among the hemoplasma genotypes detected in Belize bat species with other  
180 hemotropic and non-hemotropic *Mycoplasma* spp. Accession numbers are shown alongside bat  
181 species names. The tree was constructed with the minimum evolution method in MEGA X.  
182 Bootstrap values were evaluated from 1000 replications; those < 50% are not included on the  
183 tree. *Streptococcus equi* is used as an outgroup. The bar indicates 0.05 substitutions per site.



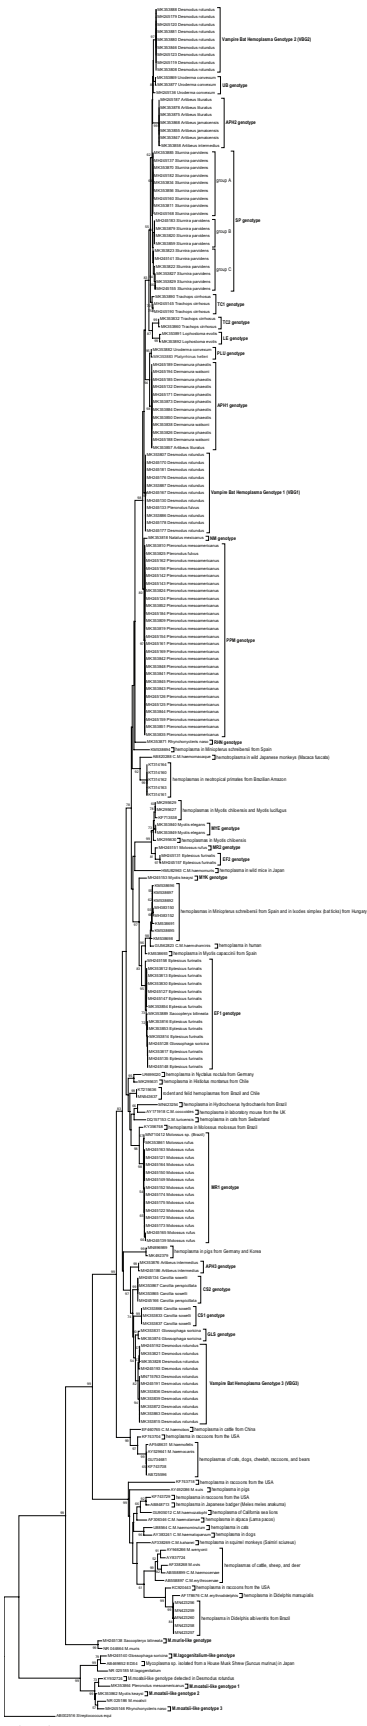

185 Figure S4. Relative abundance of the 29 hemoplasma genotypes detected in the Belize

186 Neotropical bat community in northern Belize according to site, year, and bat species.

187

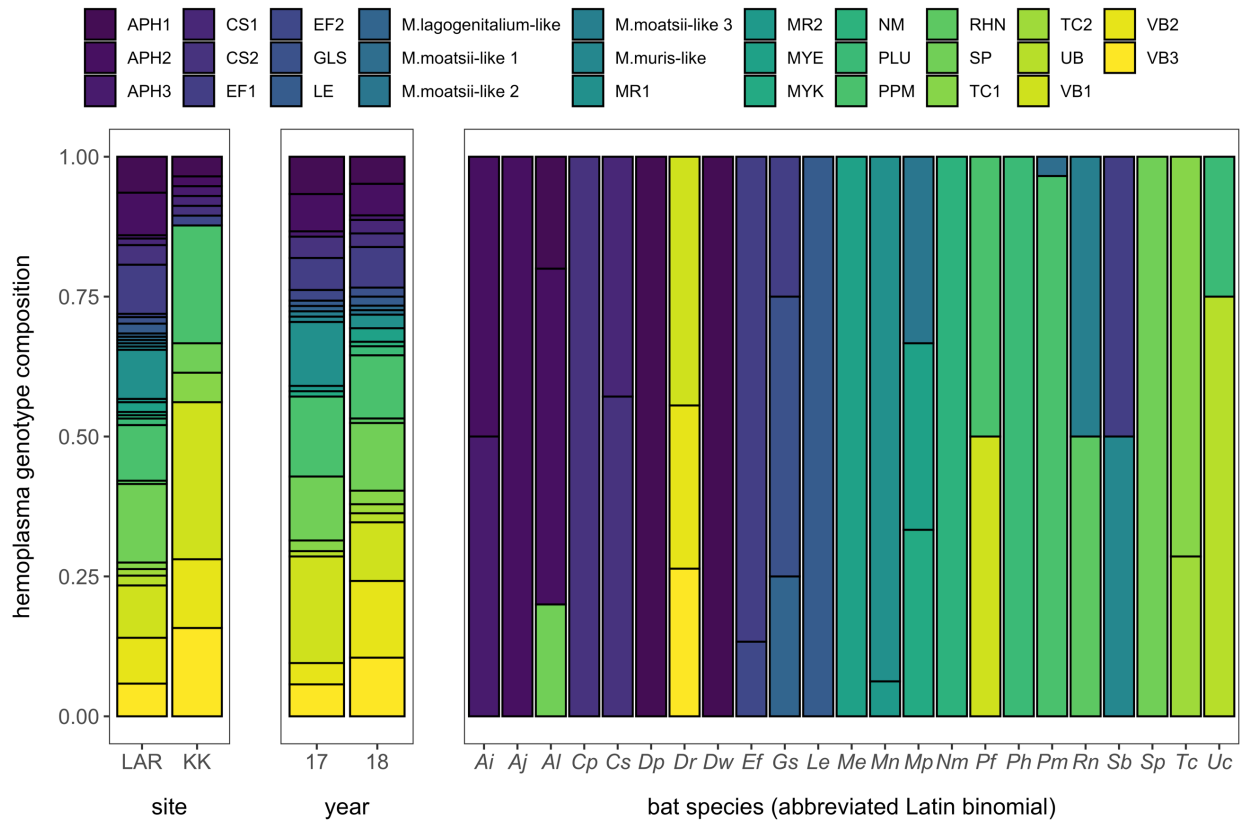

188

189 Figure S5. Contribution of unique bat–genotype links (squared residuals) to cophylogenetic  
 190 signal ( $m^2_{XY}$ ) from PACo. Links are considered supportive of coevolution if the upper 95%  
 191 confidence interval falls below the mean squared residuals (shown in the dashed line).

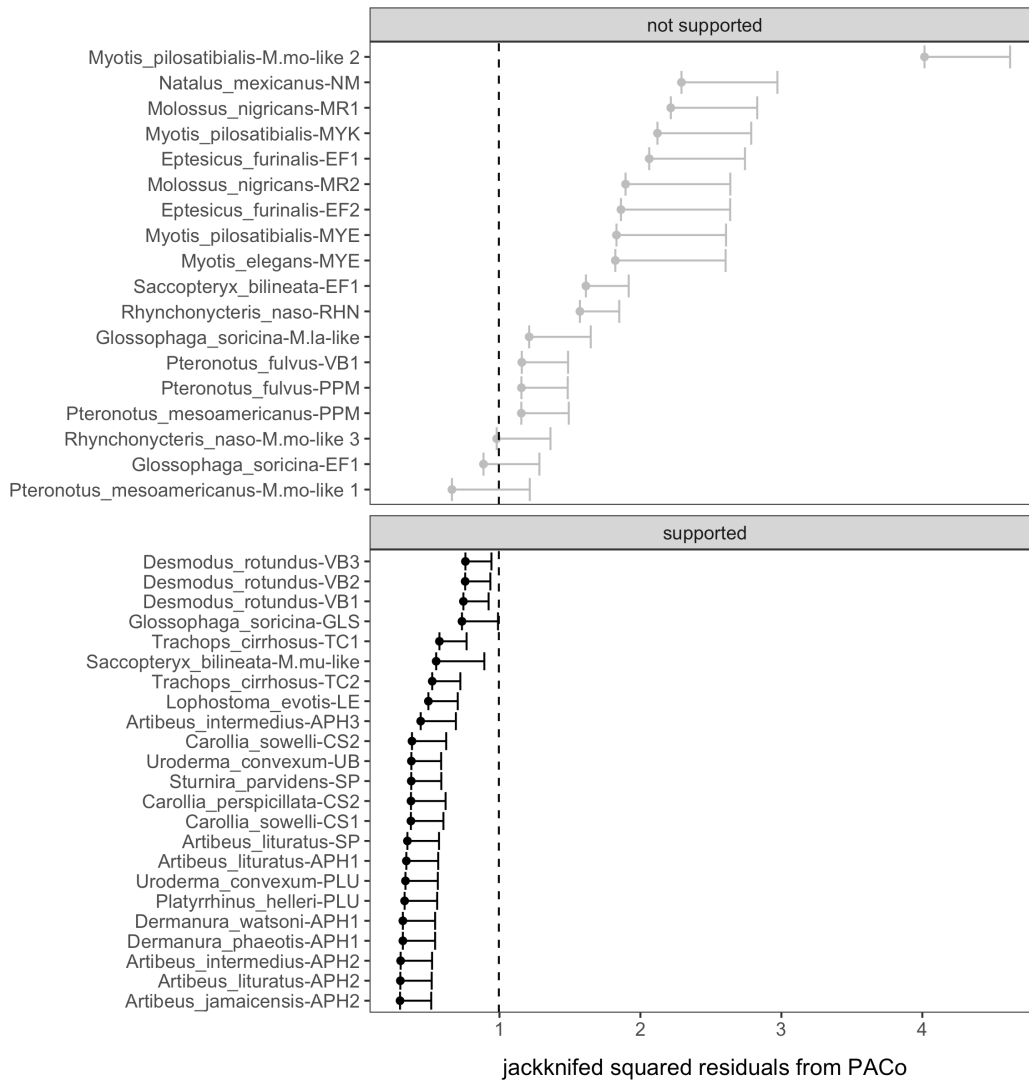

192

193

194 Figure S6. Metrics of network centrality (degree, eigenvector centrality) for sharing of  
 195 hemoplasma genotypes between bat species in Belize.

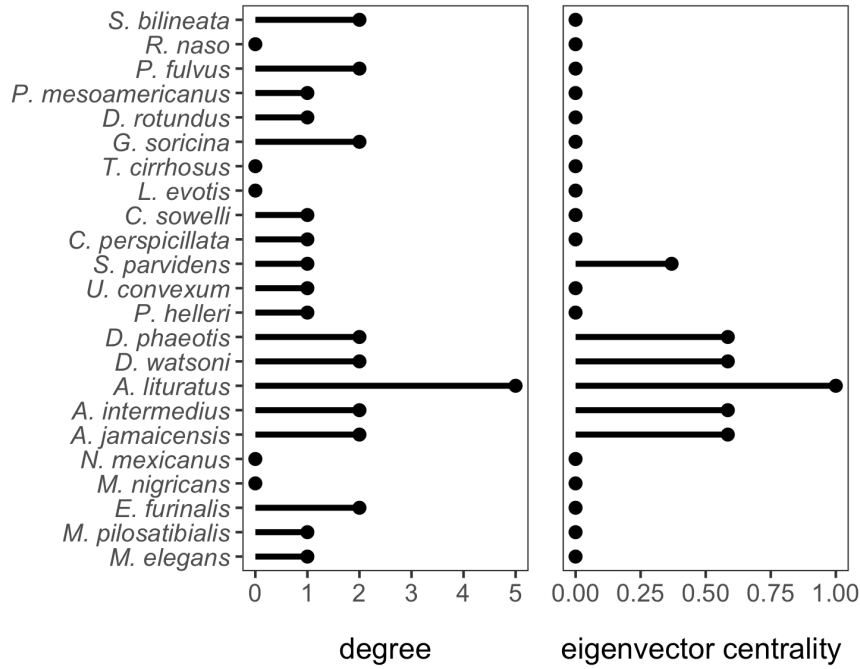

196

197 Figure S7. Networks of hemoplasma genotype sharing across the Belize bat community,  
198 stratified by site and year. Nodes represent bat species (abbreviated by their Latin binomial), and  
199 edges represent whether two nodes share any hemoplasma genotypes. Nodes with no edges  
200 represent bat species that do not share any hemoplasma genotypes with other bat species.

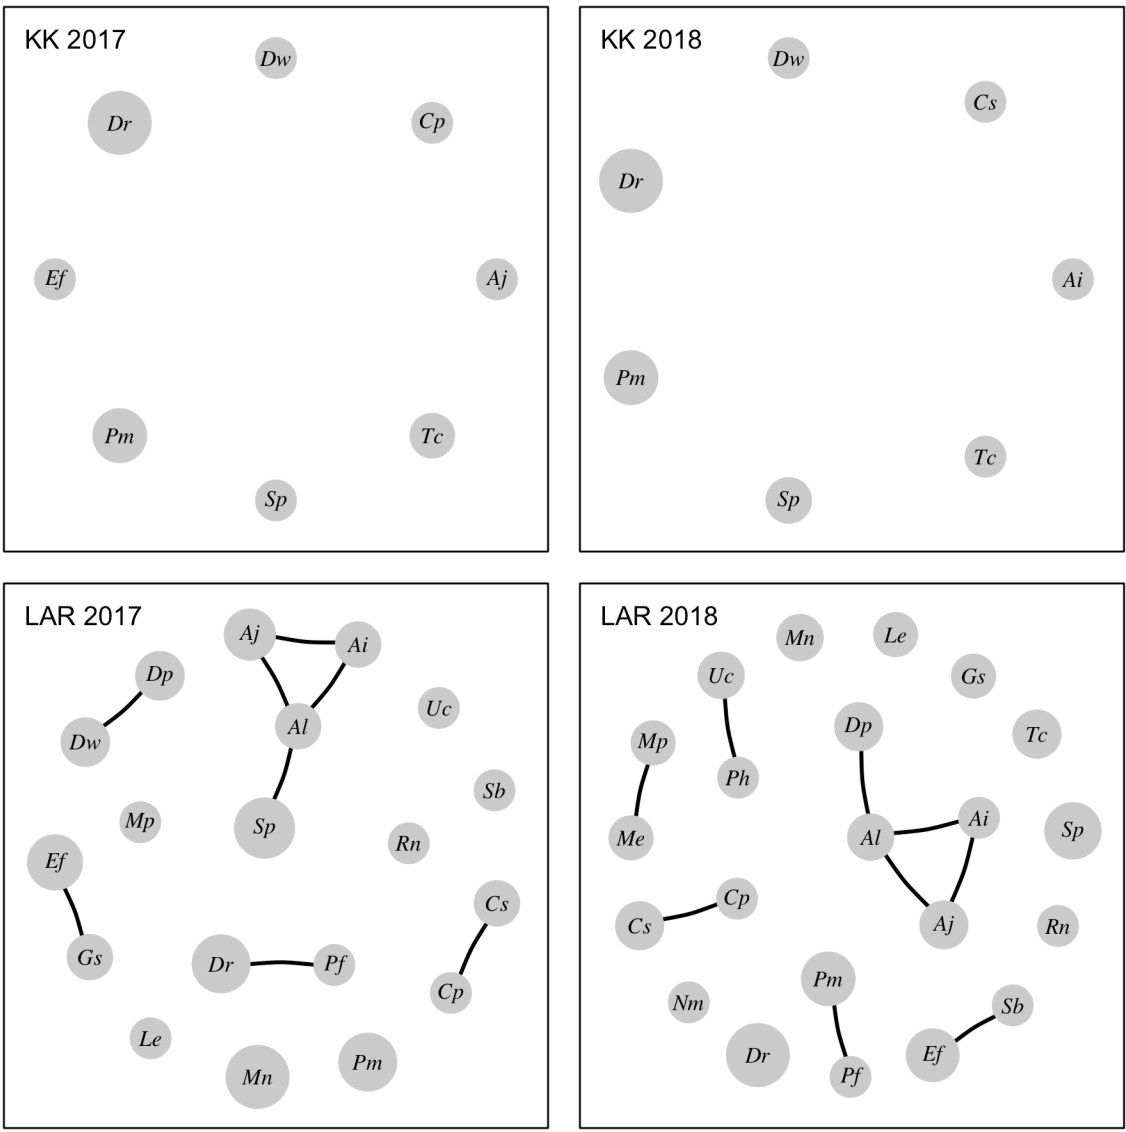

201

202 Table S5. Results of GLMs applied to each hemoplasma genotype sharing network centrality  
203 measure as a function of site, year, and their interaction term.

| <b>Variable</b>               | <b><math>\chi^2</math></b> | <b><i>p</i></b> |
|-------------------------------|----------------------------|-----------------|
| <i>Degree</i>                 |                            |                 |
| Site                          | 21.19                      | <0.001          |
| Year                          | 0.007                      | 0.93            |
| Site * year                   | 0                          | 1               |
| <i>Eigenvector centrality</i> |                            |                 |
| Site                          | 112.33                     | <0.001          |
| Year                          | 0.046                      | 0.83            |
| Site * year                   | 0.017                      | 0.90            |

204

205 Table S6. Competing PGLS models predicting degree (from the hemoplasma genotype network)  
 206 across the Belize bat community. Models are ranked by  $\Delta\text{AICc}$  with the number of coefficients  
 207 ( $k$ ), Akaike weights ( $w_i$ ), and a likelihood ratio test pseudo- $R^2$ .

| <b>Model structure</b>                                | <b><math>k</math></b> | <b><math>\Delta\text{AICc}</math></b> | <b><math>w_i</math></b> | <b><math>R^2</math></b> |
|-------------------------------------------------------|-----------------------|---------------------------------------|-------------------------|-------------------------|
| Square-root degree ~ % plants                         | 2                     | 0                                     | 0.25                    | 0.21                    |
| Square-root degree ~ log aspect ratio                 | 2                     | 0.82                                  | 0.16                    | 0.18                    |
| Square-root degree ~ dietary guild                    | 3                     | 1.66                                  | 0.11                    | 0.25                    |
| Square-root degree ~ log annual fecundity             | 2                     | 2.02                                  | 0.09                    | 0.14                    |
| Square-root degree ~ log evolutionary distinctiveness | 2                     | 2.12                                  | 0.08                    | 0.13                    |
| Square-root degree ~ 1                                | 1                     | 2.77                                  | 0.06                    | 0                       |
| Square-root degree ~ roost flexibility                | 2                     | 3.35                                  | 0.05                    | 0.09                    |
| Square-root degree ~ foraging strata                  | 3                     | 3.51                                  | 0.04                    | 0.19                    |
| Square-root degree ~ colony size                      | 2                     | 3.59                                  | 0.04                    | 0.08                    |
| Square-root degree ~ log mass                         | 2                     | 3.76                                  | 0.04                    | 0.07                    |
| Square-root degree ~ square-root geographic range     | 2                     | 4.09                                  | 0.03                    | 0.06                    |
| Square-root degree ~ roost type                       | 2                     | 4.1                                   | 0.03                    | 0.06                    |
| Square-root degree ~ sample size                      | 2                     | 5.42                                  | 0.02                    | 0                       |

208

209 Table S7. Competing PGLS models predicting eigenvector centrality (from the hemoplasma  
 210 genotype network) across the Belize bat community. Models are ranked by  $\Delta\text{AICc}$  with the  
 211 number of coefficients ( $k$ ), Akaike weights ( $w_i$ ), and a likelihood ratio test pseudo- $R^2$ .

| <b>Model structure</b>                                          | <b><math>k</math></b> | <b><math>\Delta\text{AICc}</math></b> | <b><math>w_i</math></b> | <b><math>R^2</math></b> |
|-----------------------------------------------------------------|-----------------------|---------------------------------------|-------------------------|-------------------------|
| Logit eigenvector centrality ~ colony size                      | 2                     | 0                                     | 0.24                    | 0.13                    |
| Logit eigenvector centrality ~ 1                                | 1                     | 0.61                                  | 0.18                    | 0                       |
| Logit eigenvector centrality ~ % plants                         | 2                     | 0.87                                  | 0.16                    | 0.1                     |
| Logit eigenvector centrality ~ log evolutionary distinctiveness | 2                     | 2.22                                  | 0.08                    | 0.04                    |
| Logit eigenvector centrality ~ roost type                       | 2                     | 3.04                                  | 0.05                    | 0.01                    |
| Logit eigenvector centrality ~ log mass                         | 2                     | 3.21                                  | 0.05                    | 0                       |
| Logit eigenvector centrality ~ sample size                      | 2                     | 3.27                                  | 0.05                    | 0                       |
| Logit eigenvector centrality ~ roost flexibility                | 2                     | 3.28                                  | 0.05                    | 0                       |
| Logit eigenvector centrality ~ log annual fecundity             | 2                     | 3.65                                  | 0.04                    | 0                       |
| Logit eigenvector centrality ~ square-root geographic range     | 2                     | 3.8                                   | 0.04                    | 0                       |
| Logit eigenvector centrality ~ log aspect ratio                 | 2                     | 3.82                                  | 0.04                    | 0                       |
| Logit eigenvector centrality ~ dietary guild                    | 3                     | 4.34                                  | 0.03                    | 0.08                    |
| Logit eigenvector centrality ~ foraging strata                  | 3                     | 4.87                                  | 0.02                    | 0.06                    |

212



213 Figure S8. Associations between hemoplasma genotype sharing network centrality metrics and  
214 hemoplasma infection prevalence (logit-transformed as the response variable). PGLS model fit  
215 and 95% confidence intervals are shown overlaid with bat species data scaled by sample size.

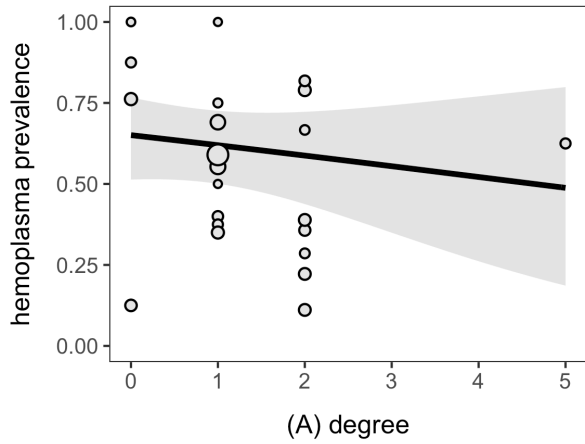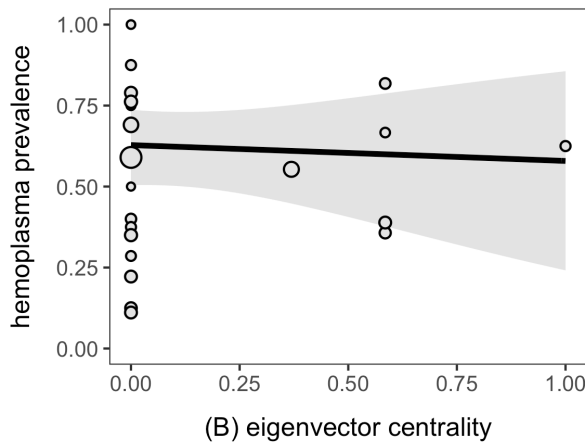

216

217

218 **S5. Ectoparasitism**

219 Figure S9. Predictors of individual ectoparasite presence. Odds ratios and 95% HDIs from the  
220 phylogenetic GLMMs, including the univariate sex effect and that adjusted for other covariates.  
221 Reference levels include males, bats sampled at LAR, reproductive bats, and bats from 2017.

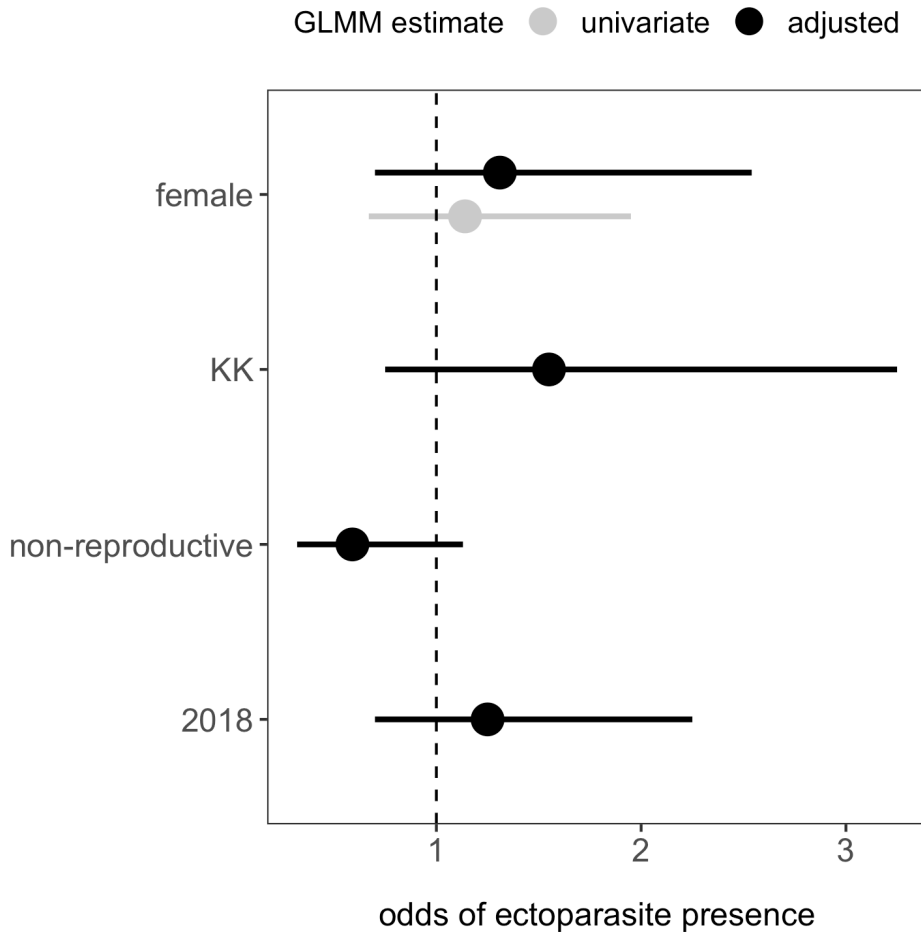

222
